# Supplementary material for: Genomic dynamics associated with malignant transformation in IDH1 mutated gliomas
Source: PubMed Central journal article supplement (PMC4791257; doi:10.18632/oncotarget.6189), 2015-10-20
Supplement: oncotarget-06-43653-s001.pdf [file oncotarget-06-43653-s001.pdf]

# Genomic dynamics associated with malignant transformation in IDH1 mutated gliomas

## Supplementary Materials

Case 1

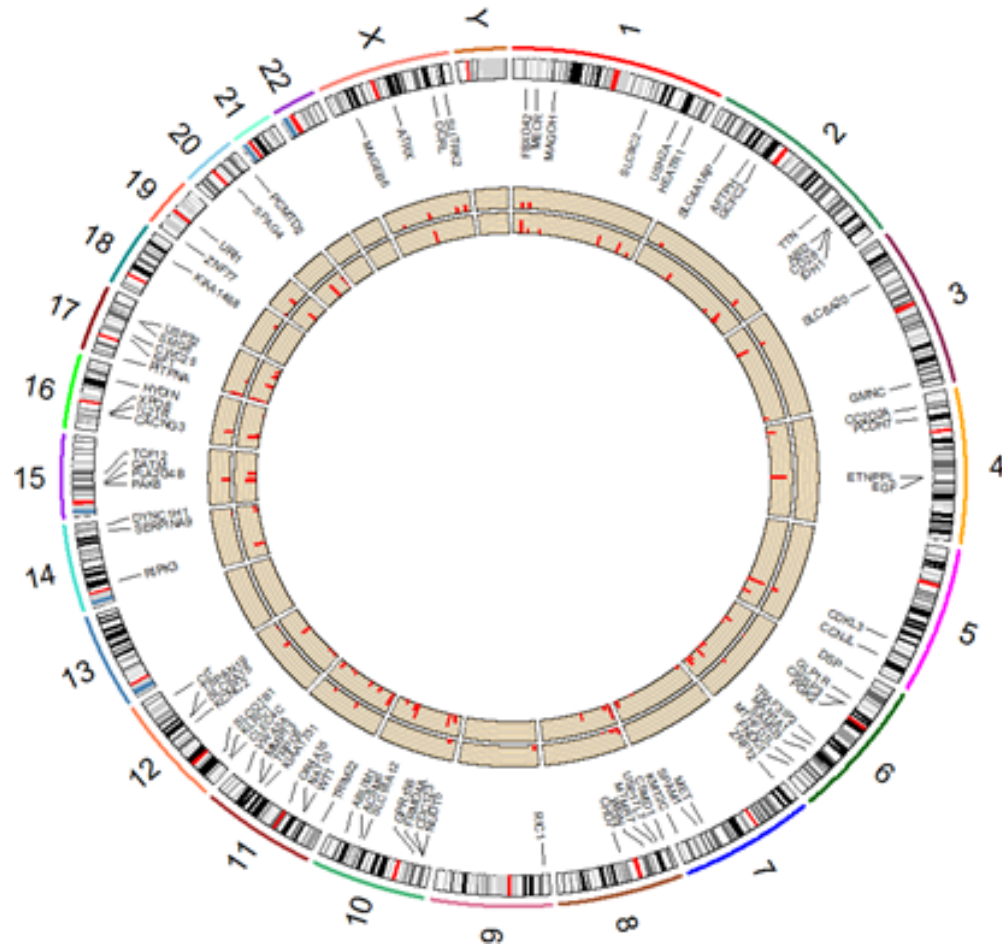

Case1: Normal vs. Benign

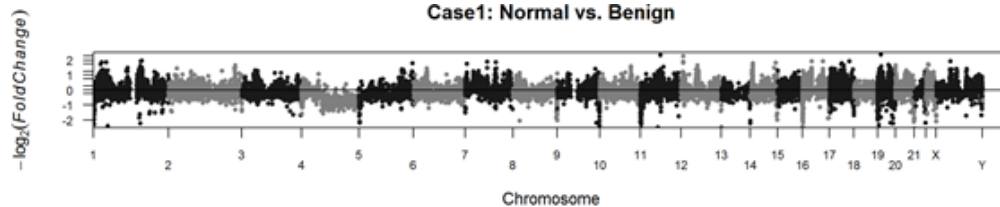

Case1: Normal vs. Malignant

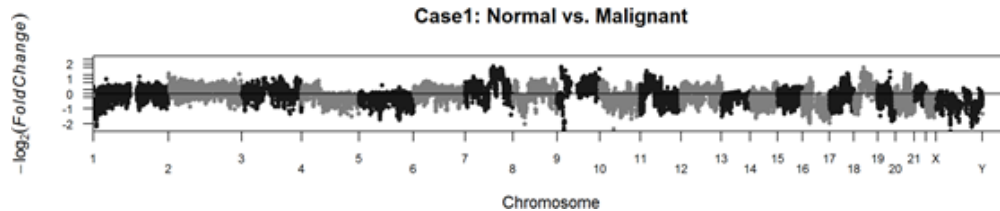

## Case 2

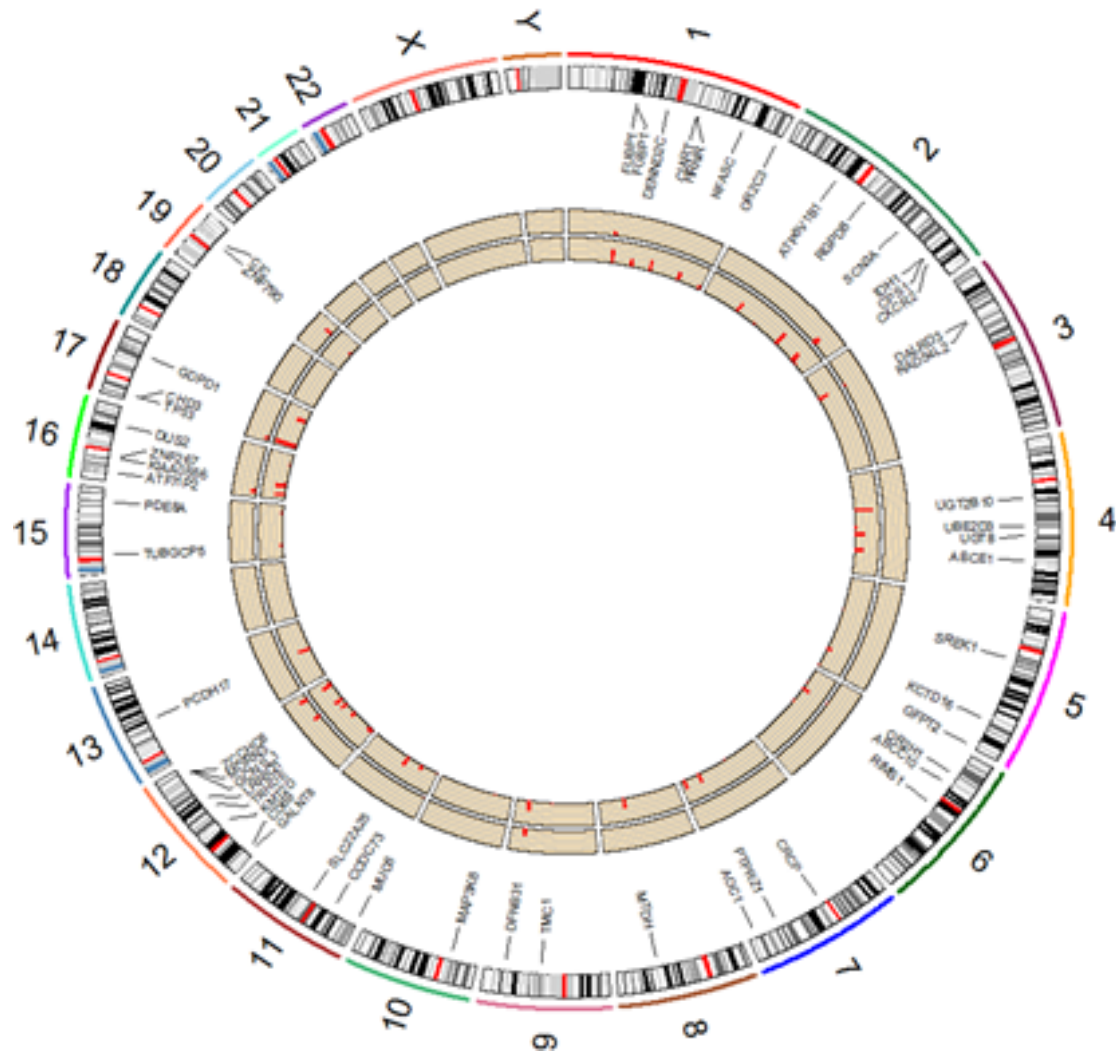

Case2: Normal vs. Benign

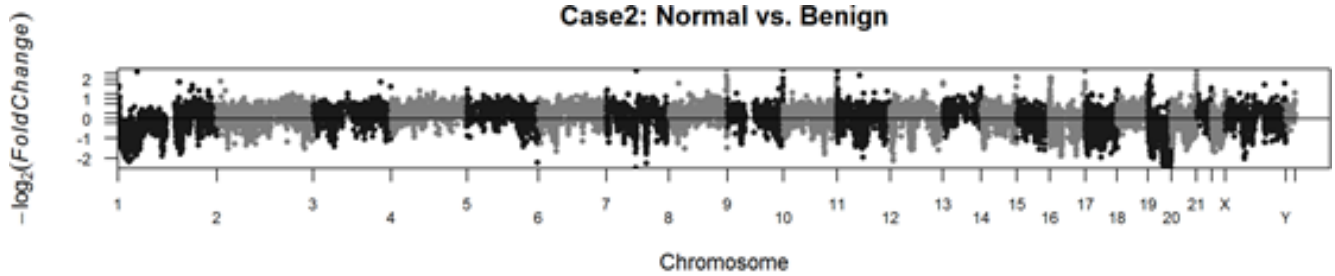

Case2: Normal vs. Malignant

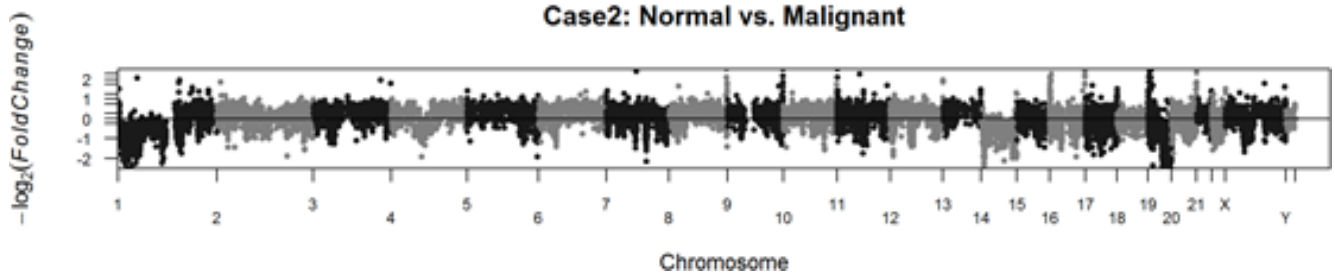

### Case 3

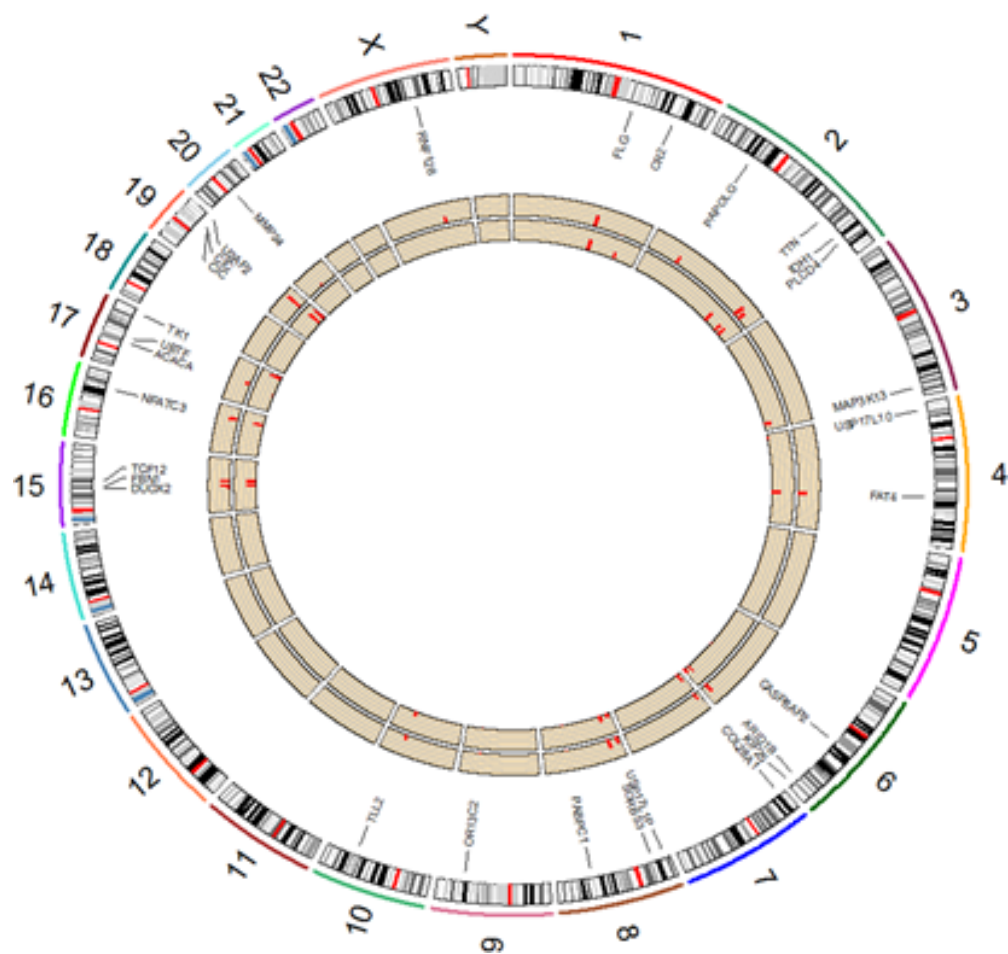

#### Case3: Normal vs. Benign

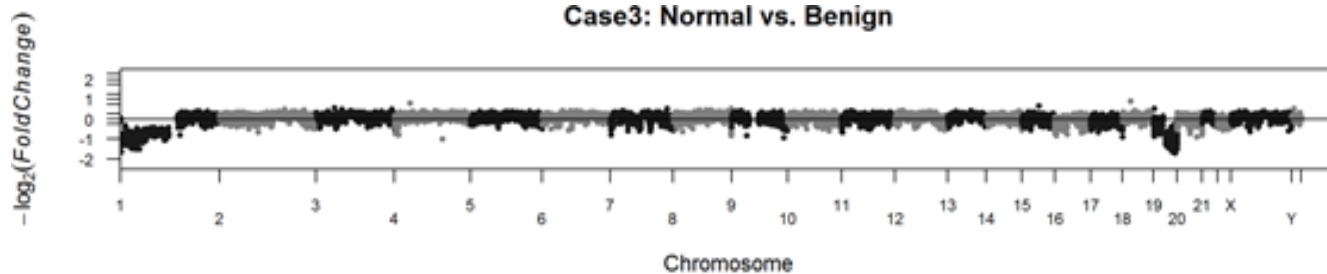

#### Case3: Normal vs. Malignant

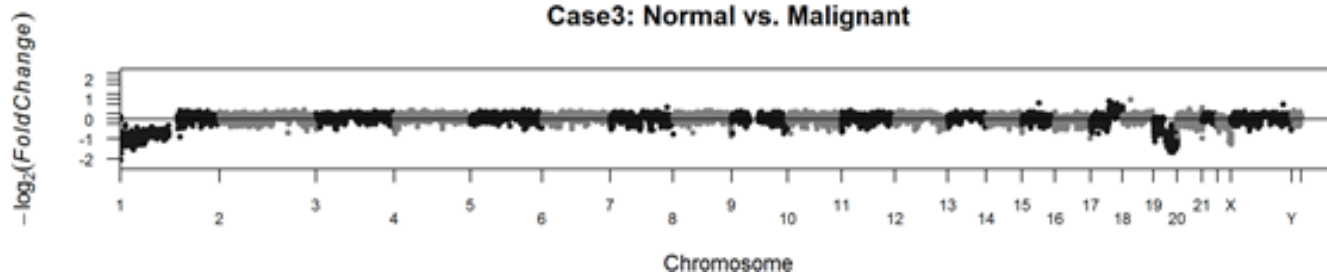

Supplementary Figure 1: The landscape view of genomic changes of each case. Genomic changes and copy number variations are presented with Circos plots and Manhattan style plots.

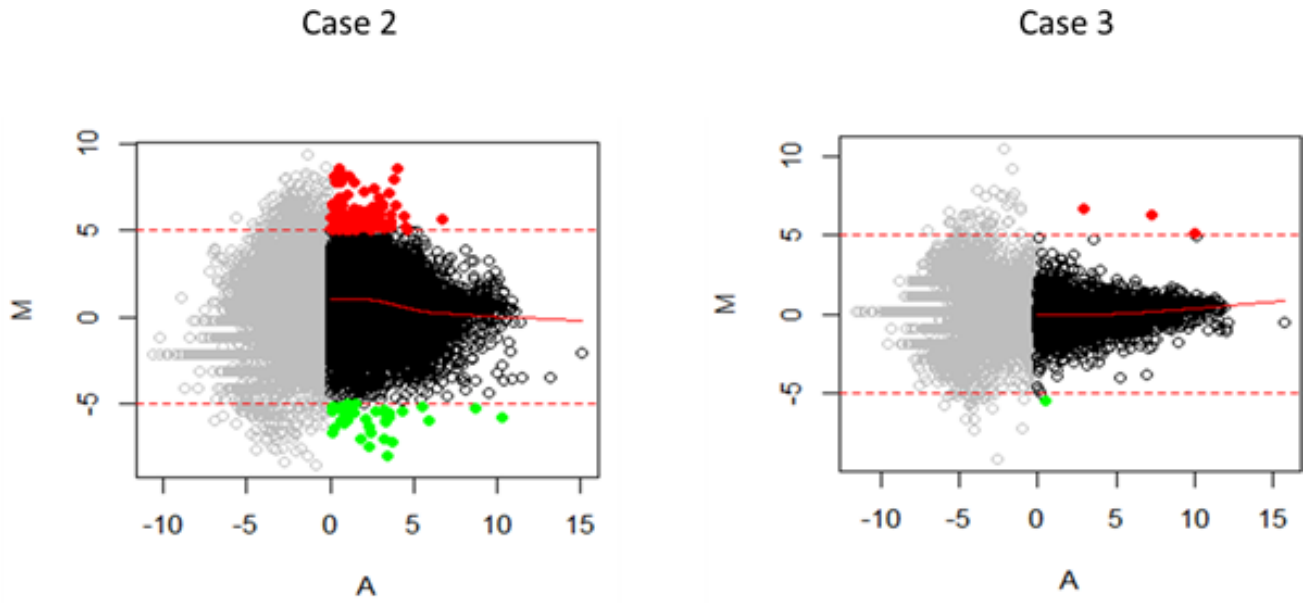

**Supplementary Figure 2: MA plots for RNA-seq expression analysis of Case 2 and Case 3.** A is the  $(x + y)/2$ , and M is the  $x - y$  where  $x$  is the  $\log_2$  RPKM of the benign sample, and  $y$  is that of the malignant sample.

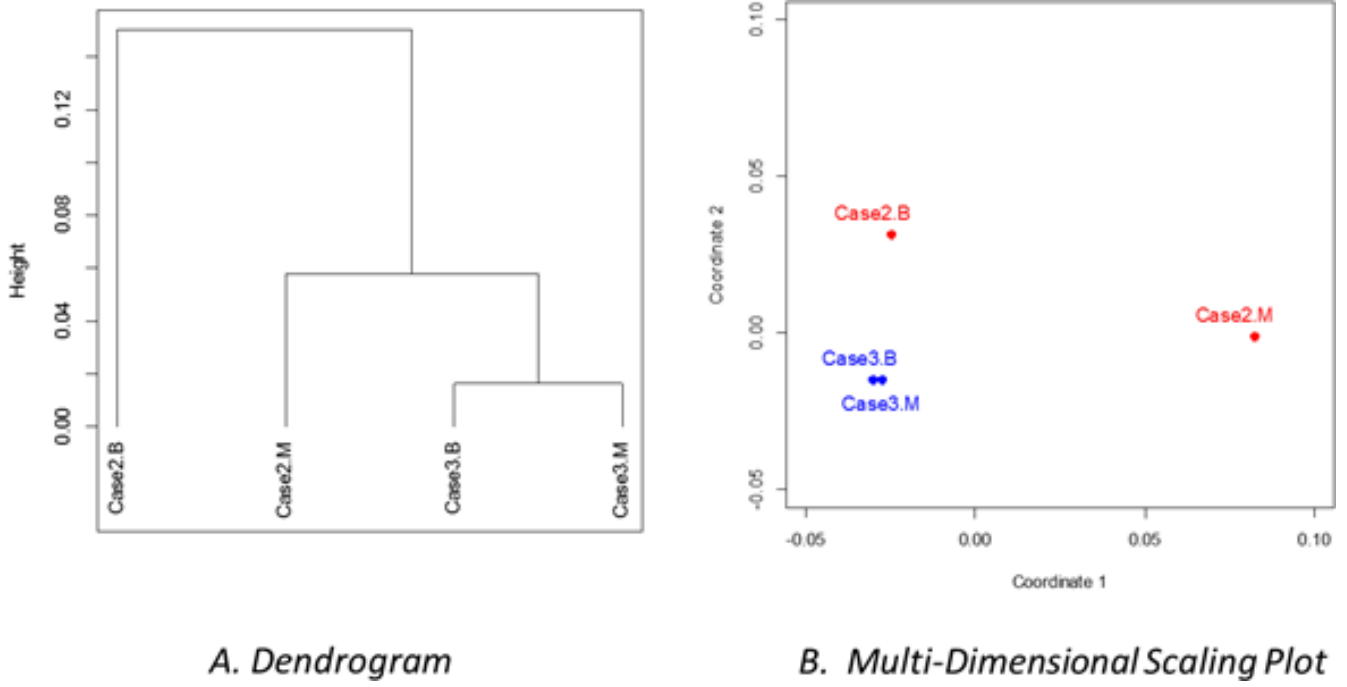

**A. Dendrogram**

**B. Multi-Dimensional Scaling Plot**

**Supplementary Figure 3: A dendrogram and a multi-dimensional scaling plot for gene expression profiles inferred from RNA-seq of Case 2 and Case 3.**

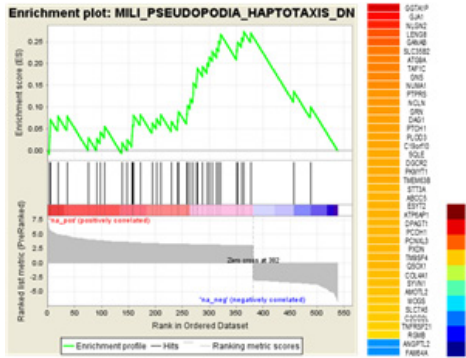

A. Gene sets enriched with genes over-expressed in malignant phenotype  
(a) MILI\_PSEUDOPODIA\_HAPTOTAXIS\_DN

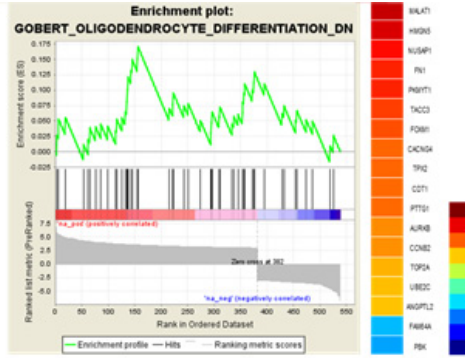

A. Gene sets enriched with genes over-expressed in malignant phenotype  
(b) GOBERT\_OLIGODENDROCYTE\_DIFFERENTIATION\_DN

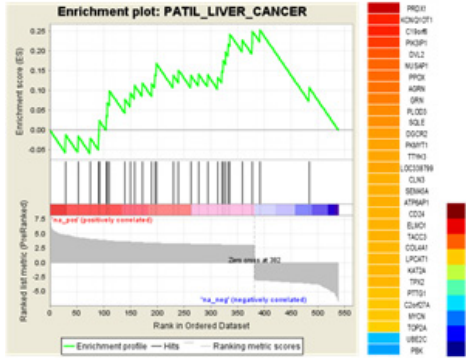

A. Gene sets enriched with genes over-expressed in malignant phenotype  
(c) PATIL\_LIVER\_CANCER

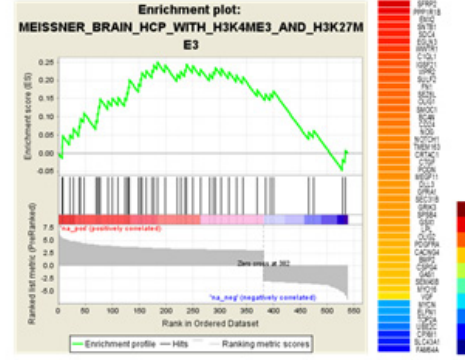

A. Gene sets enriched with genes over-expressed in malignant phenotype  
(d) MEISSNER\_BRAIN\_HCP\_WITH\_H3K4ME3\_AND\_H3K27ME3

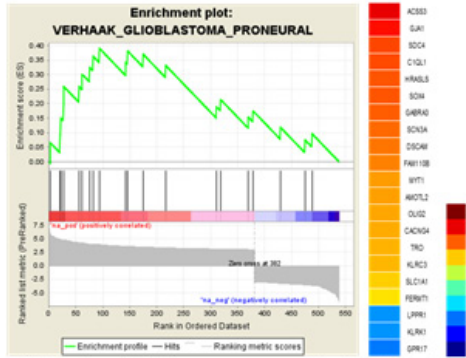

A. Gene sets enriched with genes over-expressed in malignant phenotype  
(e) VERHAAK\_GLIOMASTOMA\_PRONEURAL

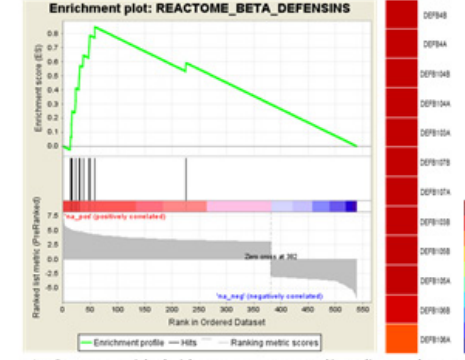

A. Gene sets enriched with genes over-expressed in malignant phenotype  
(f) REACTOME\_BETA\_DEFENSINS

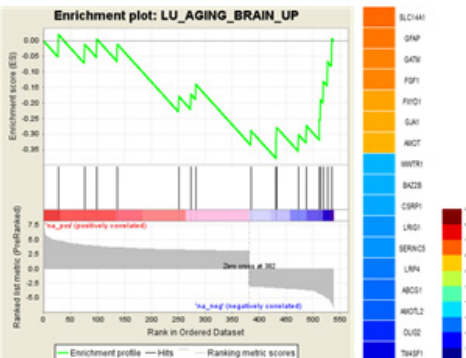

B. Gene sets enriched with genes underexpressed in malignant phenotype  
(a) LU\_AGING\_BRAIN\_UP

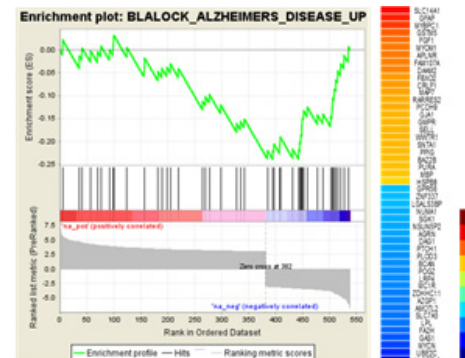

B. Gene sets enriched with genes underexpressed in malignant phenotype  
(b) BLALOCK\_ALZHEIMERS\_DISEASE\_UP

Supplementary Figure 4: The result of gene set enrichment analysis for differentially expressed genes in benign and malignant phenotype. Detailed information of gene sets are listed in Table 2.

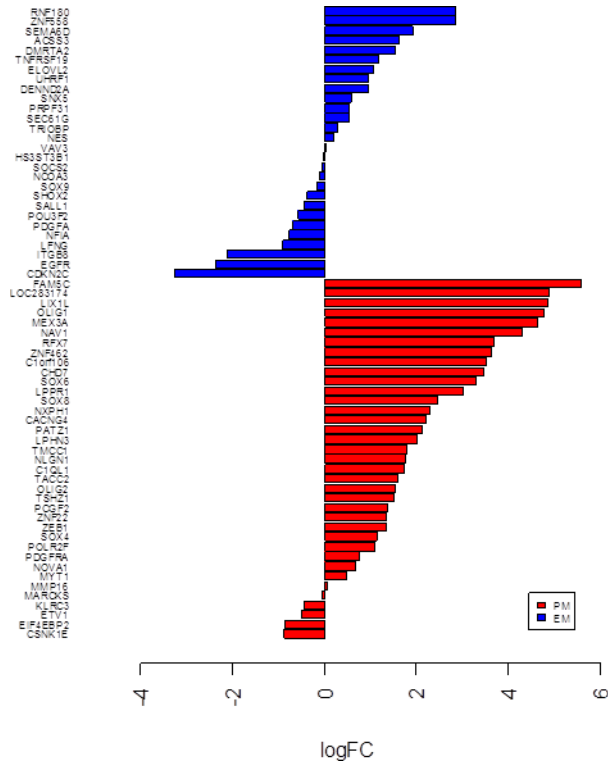

**Supplementary Figure 5: Log 2 fold changes of genes between the RPKMs of benign and malignant sample of Case 2.** The genes are selected from the PM (gene modules coexpressed around PDGFRA) and EM genes (gene module coexpressed around EGFR) used in the classification of glioma in Sun Y. et. al. (PNAS, 2014, 4;111(9):3538–43).

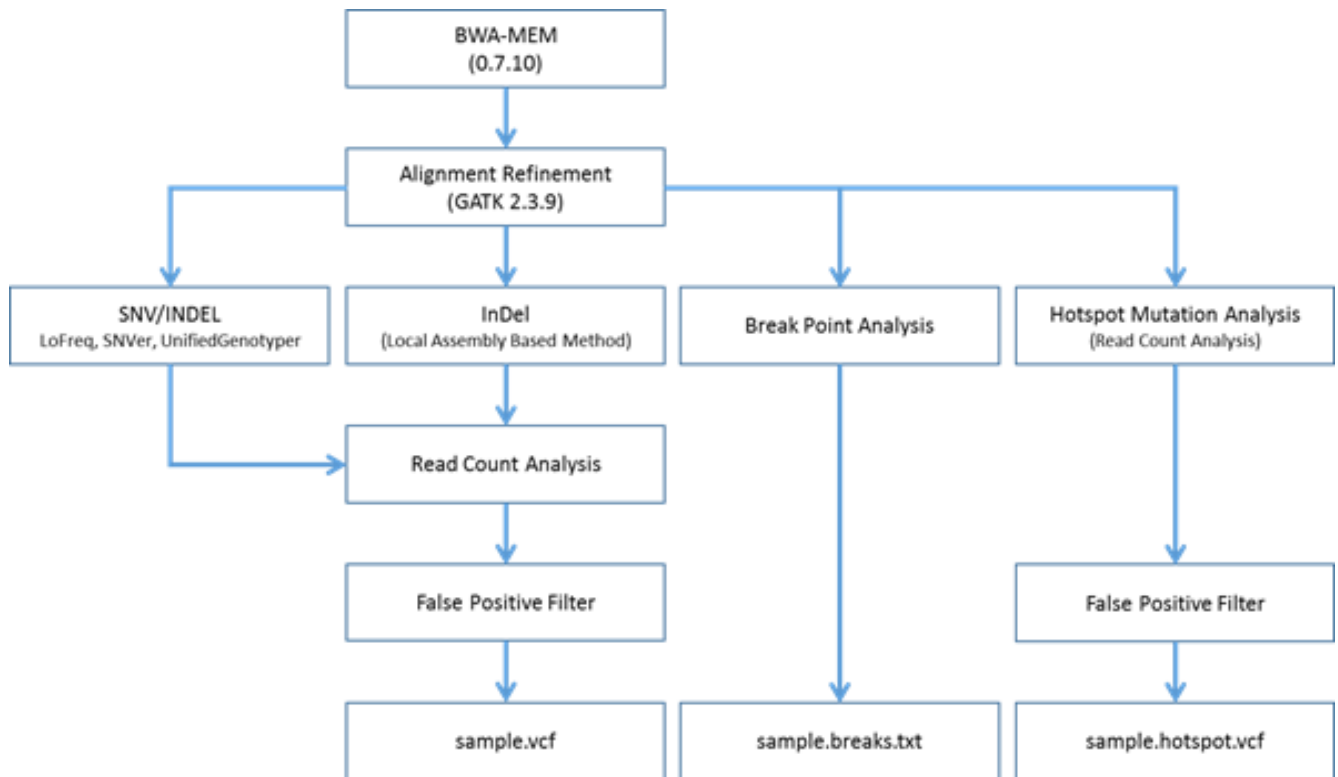

**Supplementary Figure 6: Variant calling pipeline for whole exome sequencing.**

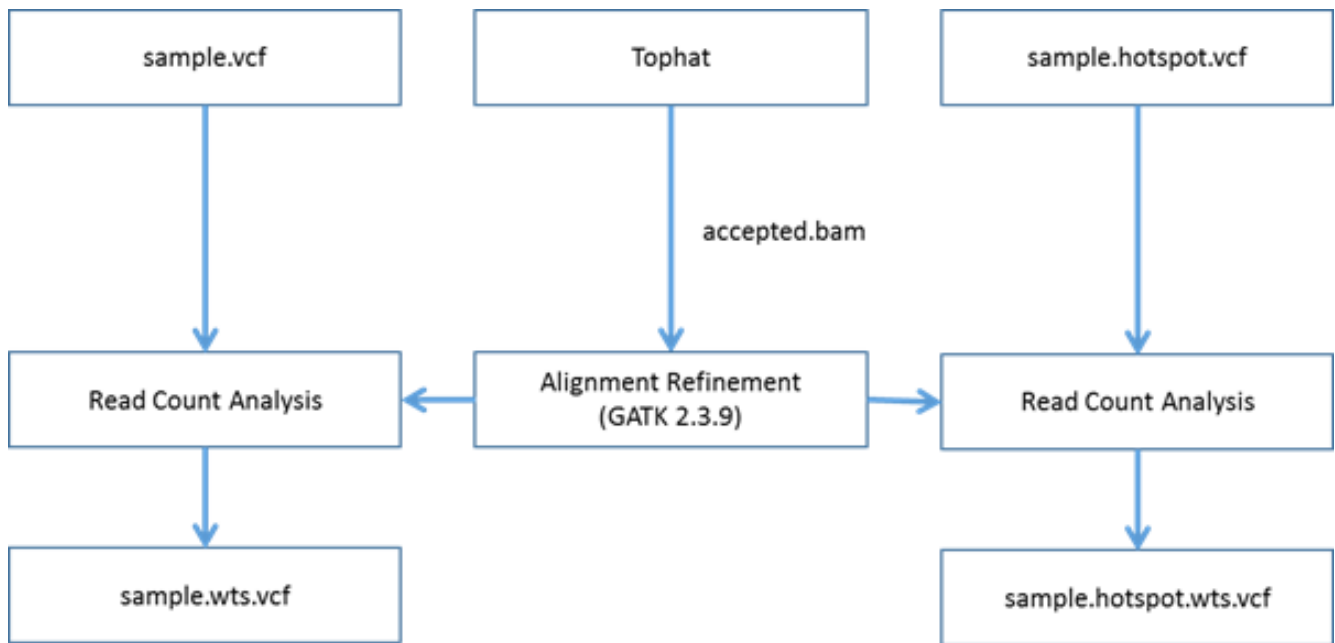

Supplementary Figure 7: Variant calling pipeline for whole transcriptome sequencing.

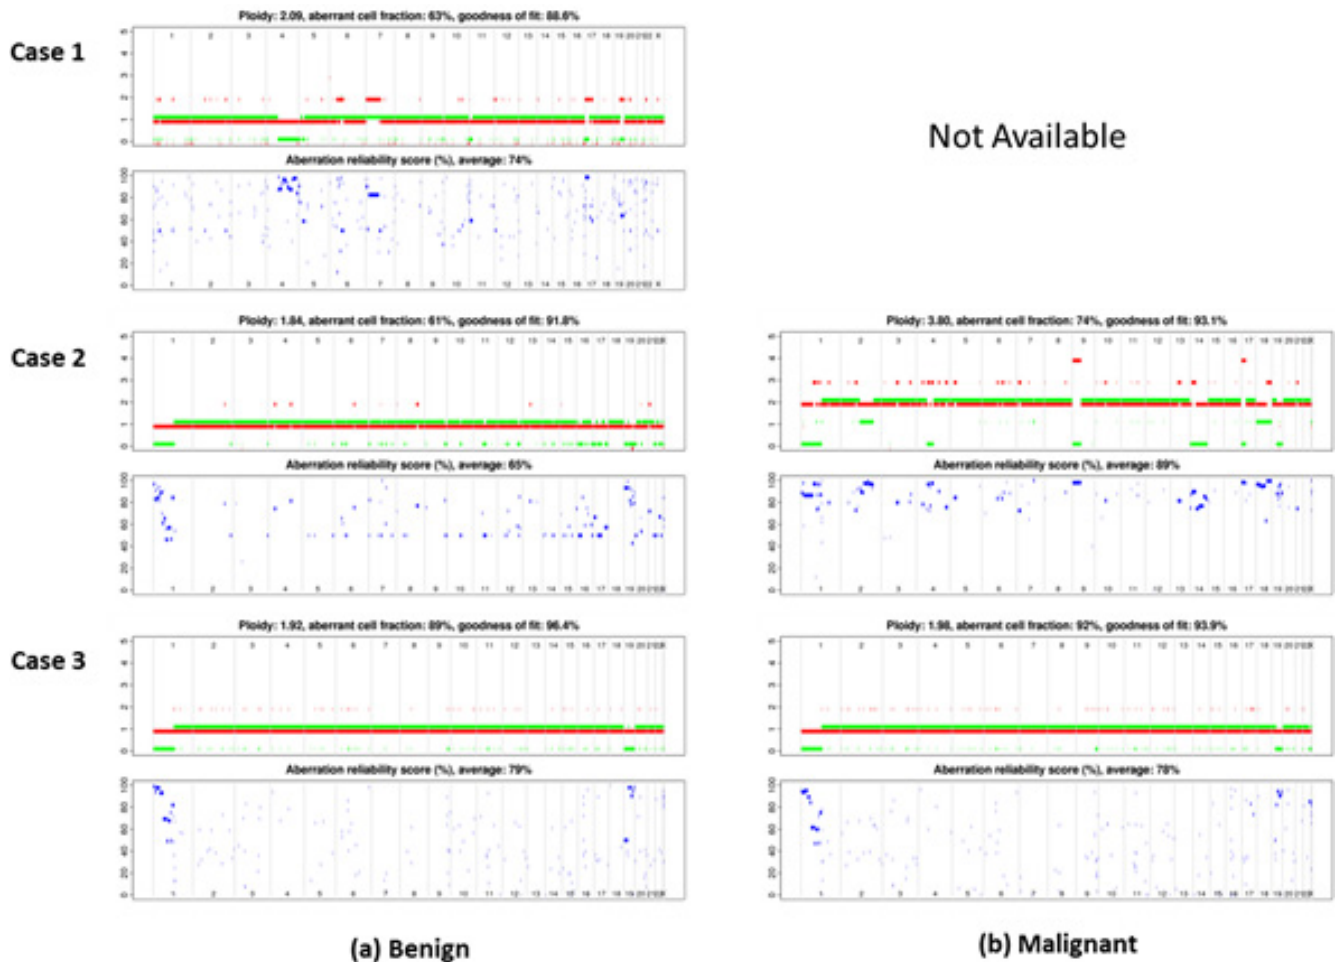

Supplementary Figure 8: Tumor ploidy and purity estimation by using ASCAT. The tumor purity of the tumor samples were eligible range of 62%–91%.

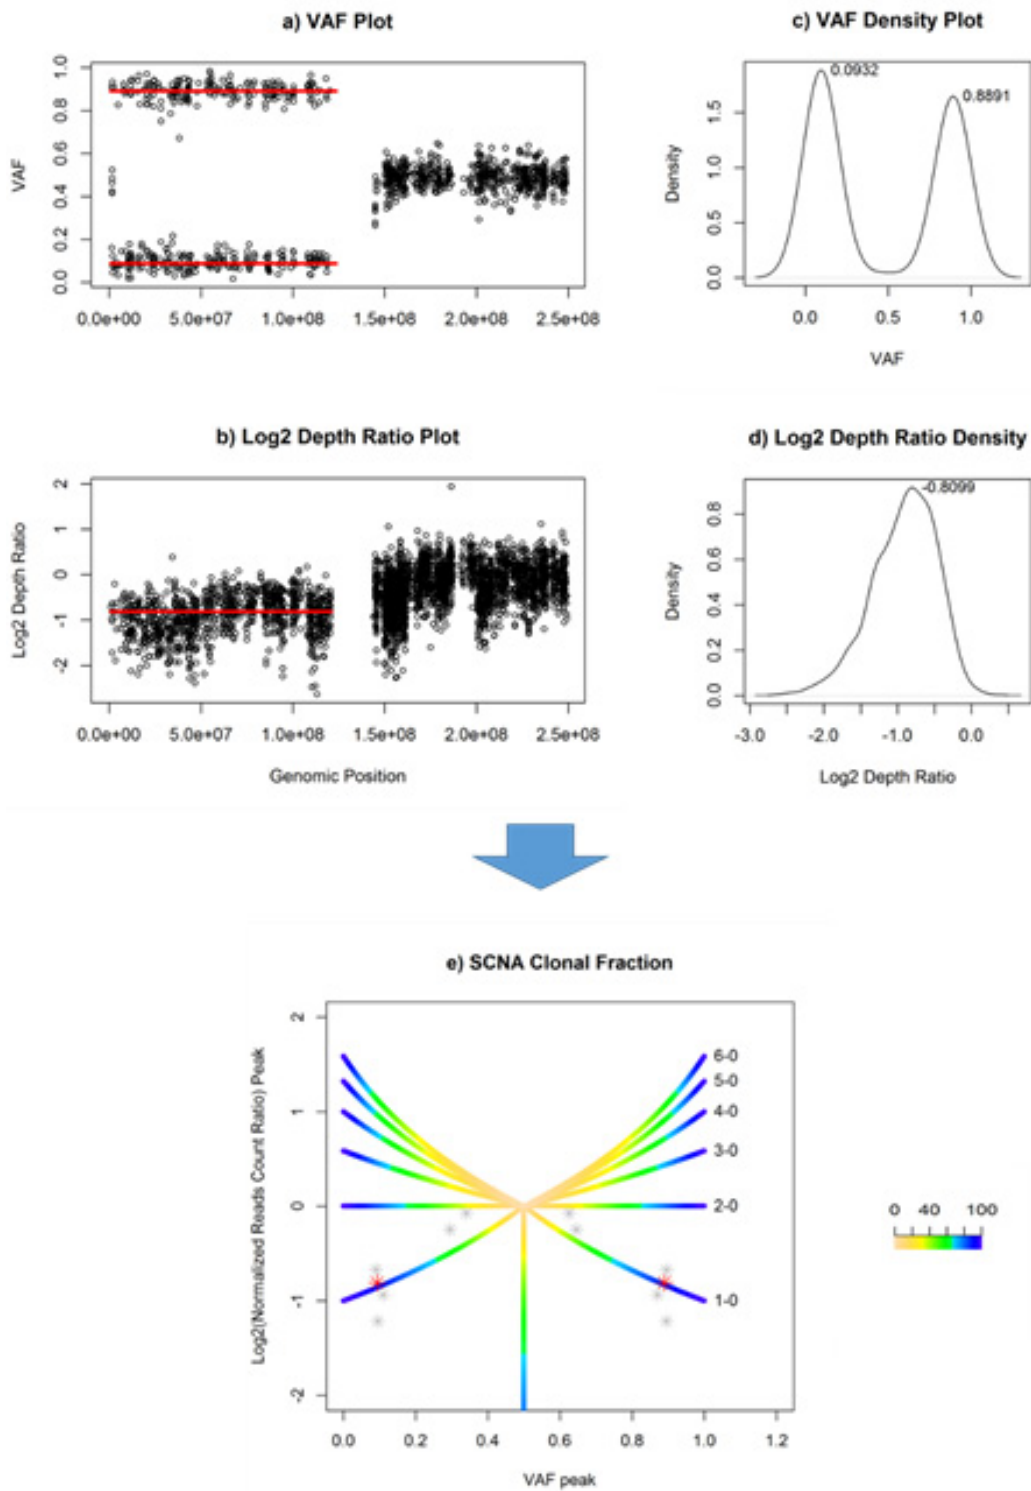

**Supplementary Figure 9: Illustration of subclonal fraction estimation by SCNA.** For a segment of SCNA indicated as red lines in (a) and (b), we estimate the density of variant allele frequencies (VAFs) in tumor sample for the heterozygous SNPs determined from matched normal sample (c) and density of log<sub>2</sub> depth ratio between the pair of the samples (d). After then, we calculate the subclonal fraction with the peak values of VAF and log<sub>2</sub> depth ratio by assuming copy number status. We can assume the copy number status of the SCNA by locating the peak values in the SCNA clonal fraction plot (e). The lines in (e) show theoretical location of peak values when the copy number status and the subclonal fraction are assumed. The assumed allele specific copy number status are represented at the end of lines. For example “1-0” means 1 copy loss, and “2-0” means copy neutral loss of heterozygous. The colors of the lines represent the assumed subclonal fraction from 0% to 100%. The positions of the exemplar SCNA in the plot (e) is denoted as red stars.



**Supplementary Table 1: Stratified gene grouping system of somatic copy number alteration and somatic mutation for clonal estimation model**

| Group                         | Benign        | Malignant     | Description                                                                    |
|-------------------------------|---------------|---------------|--------------------------------------------------------------------------------|
| <i>Copy number alteration</i> |               |               |                                                                                |
| S0                            | no-alteration | no-alteration | group of genes with no change in copy number                                   |
| S1.n*                         | deletion      | deletion      | group of genes with housekeeping deletion throughout the tumor lineage         |
| S2.n*                         | deletion      | no-deletion   | group of genes undergone natural selection during the tumor progression        |
| S3.n*                         | no-deletion   | deletion      | group of genes newly altered during the tumor progression                      |
| <i>Somatic mutation</i>       |               |               |                                                                                |
| M1.n*                         | mutation      | mutation      | group of genes with housekeeping somatic mutation throughout the tumor lineage |
| M2.n*                         | mutation      | wild-type     | group of genes undergone natural selection during the tumor progression        |
| M3.n*                         | wild-type     | mutation      | group of genes newly mutated during the tumor progression                      |

\*n = 1,2,3,... (in order from biggest to smallest fraction of genes with deletion or mutation)

**Supplementary Table 2: Lower grade glioma cases which have IDH1 mutation from TCGA dataset for validation**

| 1p19q status | Histological grade | Number of cases | Case IDs                                                                                                                                                                                                                                                                                                                                                                                                                                                                                                                                                                                                                                             |
|--------------|--------------------|-----------------|------------------------------------------------------------------------------------------------------------------------------------------------------------------------------------------------------------------------------------------------------------------------------------------------------------------------------------------------------------------------------------------------------------------------------------------------------------------------------------------------------------------------------------------------------------------------------------------------------------------------------------------------------|
| Codeletion   | Grade 2            | 45              | TCGA-HT-7695, TCGA-HT-7608, TCGA-DB-A64L, TCGA-DB-A64Q, TCGA-DB-A64V, TCGA-E1-5319, TCGA-EZ-7264, TCGA-HW-7487, TCGA-E1-5318, TCGA-HT-7480, TCGA-HT-7681, TCGA-CS-6668, TCGA-DB-5278, TCGA-DB-A4XA, TCGA-DB-A64R, TCGA-DB-A64U, TCGA-DU-5870, TCGA-DU-6400, TCGA-DU-7294, TCGA-FG-5964, TCGA-FG-7634, TCGA-FG-7641, TCGA-FG-A60K, TCGA-HT-7875, TCGA-HT-7877, TCGA-HT-8012, TCGA-HW-7491, TCGA-DU-8164, TCGA-CS-5390, TCGA-DU-5849, TCGA-HT-7467, TCGA-HT-7481, TCGA-HT-A615, TCGA-FG-8187, TCGA-HT-7605, TCGA-DU-7009, TCGA-DB-5279, TCGA-DB-A4XH, TCGA-DU-5874, TCGA-HT-7607, TCGA-HT-7692, TCGA-HT-7881, TCGA-HT-8010, TCGA-HW-7486, TCGA-HW-7495 |
|              | Grade 3            | 34              | TCGA-HT-8105, TCGA-DH-5144, TCGA-CS-5394, TCGA-DB-5274, TCGA-DU-8168, TCGA-HT-7471, TCGA-HT-7616, TCGA-HT-7677, TCGA-HT-7694, TCGA-FG-7638, TCGA-DH-5141, TCGA-DB-A64P, TCGA-DB-A64W, TCGA-DU-6393, TCGA-DU-7018, TCGA-DU-7302, TCGA-E1-5311, TCGA-FG-5962, TCGA-HT-7468, TCGA-HT-A4DV, TCGA-HT-A5R9, TCGA-IK-8125, TCGA-DU-7300, TCGA-DU-6394, TCGA-DU-6397, TCGA-HT-7620, TCGA-CS-5396, TCGA-DB-A4XG, TCGA-DU-6410, TCGA-FG-8186, TCGA-HT-7687, TCGA-HT-7856, TCGA-HT-7874, TCGA-HT-8109                                                                                                                                                           |

|        |         |    |                                                                                                                                                                                                                                                                                                                                                                                                                                                                                                                                                                                                                                                                                                                                                                                                                                                                                                                                                                                                      |
|--------|---------|----|------------------------------------------------------------------------------------------------------------------------------------------------------------------------------------------------------------------------------------------------------------------------------------------------------------------------------------------------------------------------------------------------------------------------------------------------------------------------------------------------------------------------------------------------------------------------------------------------------------------------------------------------------------------------------------------------------------------------------------------------------------------------------------------------------------------------------------------------------------------------------------------------------------------------------------------------------------------------------------------------------|
| Intact | Grade 2 | 69 | TCGA-DU-6401, TCGA-CS-6667, TCGA-HT-7472, TCGA-HT-7610, TCGA-DB-5280, TCGA-DB-A4XC, TCGA-DU-5853, TCGA-DU-5871, TCGA-DU-5872, TCGA-DU-6395, TCGA-DU-6407, TCGA-DU-7007, TCGA-DU-7008, TCGA-DU-7015, TCGA-DU-7301, TCGA-DU-7306, TCGA-DU-8166, TCGA-DU-8167, TCGA-DU-A5TR, TCGA-DU-A5TU, TCGA-E1-5322, TCGA-FG-5965, TCGA-FG-6689, TCGA-FG-6690, TCGA-FG-8182, TCGA-FG-8188, TCGA-FG-A4MT, TCGA-FG-A4MX, TCGA-FG-A4MY, TCGA-HT-7473, TCGA-HT-7474, TCGA-HT-7476, TCGA-HT-7478, TCGA-HT-7482, TCGA-HT-7483, TCGA-HT-7485, TCGA-HT-7603, TCGA-HT-7604, TCGA-HT-7611, TCGA-HT-7676, TCGA-HT-7689, TCGA-HT-7693, TCGA-HT-7858, TCGA-HT-7873, TCGA-HT-7880, TCGA-HT-7902, TCGA-HT-8013, TCGA-HT-8018, TCGA-HT-8108, TCGA-HT-A5R5, TCGA-HT-A5RB, TCGA-HT-A614, TCGA-HW-7489, TCGA-HW-7490, TCGA-IK-7675, TCGA-P5-A5EW, TCGA-P5-A5F1, TCGA-CS-4938, TCGA-DB-A4X9, TCGA-FG-6691, TCGA-FG-A60J, TCGA-HT-7602, TCGA-HT-7606, TCGA-HT-7884, TCGA-DU-A5TS, TCGA-HT-A616, TCGA-CS-4944, TCGA-FG-8189, TCGA-HT-8113 |
|        | Grade 3 | 56 | TCGA-FG-7636, TCGA-CS-6665, TCGA-DB-A4XF, TCGA-DU-6408, TCGA-CS-4942, TCGA-CS-4943, TCGA-CS-6666, TCGA-DB-5273, TCGA-DB-5275, TCGA-DB-5281, TCGA-DB-A4XB, TCGA-DB-A4XD, TCGA-DB-A4XE, TCGA-DH-5142, TCGA-DH-A66B, TCGA-DU-5851, TCGA-DU-5855, TCGA-DU-6396, TCGA-DU-7298, TCGA-DU-7304, TCGA-DU-7309, TCGA-DU-8163, TCGA-DU-A5TP, TCGA-DU-A5TW, TCGA-E1-5302, TCGA-E1-5303, TCGA-E1-5304, TCGA-E1-5305, TCGA-E1-5307, TCGA-FG-8185, TCGA-FG-8191, TCGA-FN-7833, TCGA-HT-7470, TCGA-HT-7475, TCGA-HT-7686, TCGA-HT-7688, TCGA-HT-7690, TCGA-HT-7855, TCGA-HT-7879, TCGA-HT-8114, TCGA-HT-8563, TCGA-CS-5393, TCGA-CS-6290, TCGA-DB-5277, TCGA-DH-5143, TCGA-DU-6542, TCGA-DU-7010, TCGA-DU-7019, TCGA-DU-7299, TCGA-HT-7479, TCGA-HT-7601, TCGA-HT-7609, TCGA-HT-8106, TCGA-HT-8111, TCGA-DB-5276, TCGA-HT-7684                                                                                                                                                                                       |
|        | Grade 4 | 12 | TCGA-06-0128, TCGA-14-4157, TCGA-14-1456, TCGA-06-0129, TCGA-06-2570, TCGA-06-6389, TCGA-02-2483, TCGA-15-1444, TCGA-19-2629, TCGA-26-1442, TCGA-27-2521, TCGA-32-4208                                                                                                                                                                                                                                                                                                                                                                                                                                                                                                                                                                                                                                                                                                                                                                                                                               |

**Supplementary Table 3: The result of RNA-seq**

|                                       | Case 2     |            | Case 3     |            |
|---------------------------------------|------------|------------|------------|------------|
|                                       | Benign     | Malignant  | Benign     | Malignant  |
| <i>Coverage</i>                       |            |            |            |            |
| Total reads                           | 58,867,728 | 66,013,344 | 58,198,324 | 57,650,096 |
| Reads map to +                        | 26,160,089 | 29,492,007 | 26,008,229 | 26,223,402 |
| Reads map to -                        | 25,356,906 | 29,228,973 | 26,086,444 | 26,067,776 |
| Multiple mapped reads                 | 1,736,519  | 2,218,162  | 1,246,583  | 1,244,881  |
| Percent of reads mapped               | 90.5%      | 92.3%      | 91.7%      | 92.9%      |
| <i>Fold change (FC) analysis</i>      |            |            |            |            |
| Up-regulated in malignant phenotype   |            |            |            |            |
| log <sub>2</sub> (FC) > 3             |            | 382        |            | 8          |
| log <sub>2</sub> (FC) > 4             |            | 85         |            | 5          |
| log <sub>2</sub> (FC) > 5             |            | 19         |            | 3          |
| Down-regulated in malignant phenotype |            |            |            |            |
| log <sub>2</sub> (FC) < -3            |            | 157        |            | 3          |
| log <sub>2</sub> (FC) < -4            |            | 33         |            | 0          |
| log <sub>2</sub> (FC) < -5            |            | 13         |            | 0          |

**Supplementary Table 4: Ploidy and purity estimation of tumor samples with SNP array by applying ASCAT**

| Case  | Benign |        |                  | Malignant |        |                 |
|-------|--------|--------|------------------|-----------|--------|-----------------|
|       | Ploidy | Purity | Goodness -of-Fit | Ploidy    | Purity | Goodness-of-Fit |
| Case1 | 2.09   | 63%    | 88.6%            | N/A       | N/A    | N/A             |
| Case2 | 1.84   | 61%    | 91.8%            | 3.80      | 74%    | 93.1%           |
| Case3 | 1.92   | 89%    | 96.4%            | 1.98      | 92%    | 93.9%           |
